# Supplementary material for: Cecropin A Improves the Antibacterial Activity of Hen Egg White Lysozyme against Challenging Salmonella enterica Serovars
Source: MDPI journal article supplement (doi:10.3390/pharmaceutics14102201), 2022-10-16
Supplement: s1 [file s1]

## Supplementary Material

### Cecropin A Improves the Antibacterial activity of Hen Egg White Lysozyme against challenging *Salmonella enterica* serovars

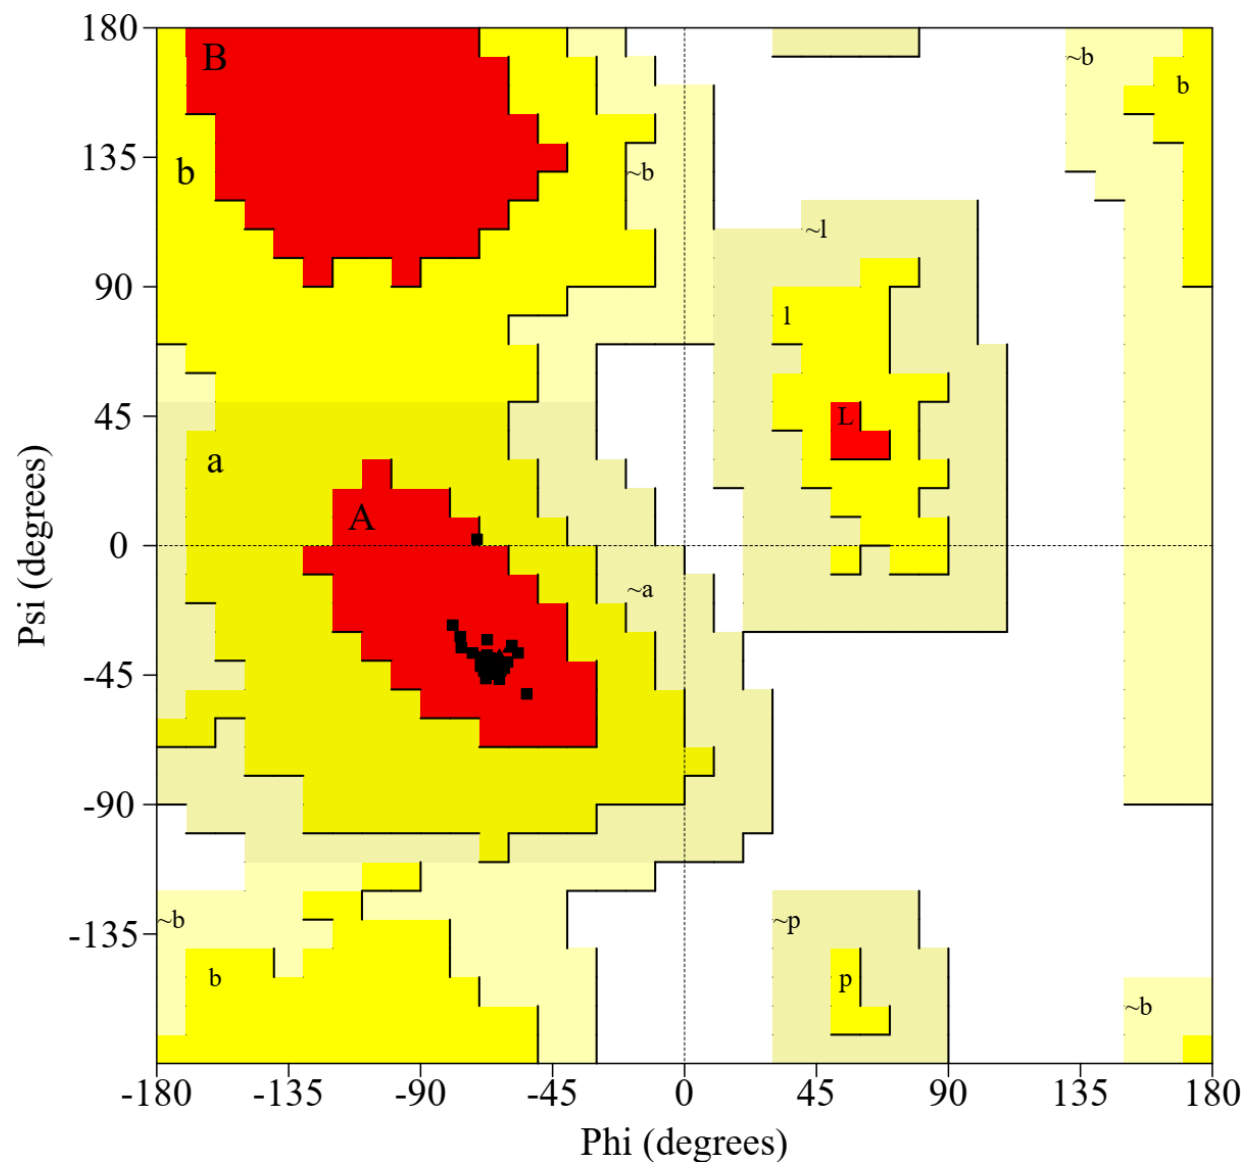

**Figure S1.** Ramachandran plot of the generated cecropin model. All the protein residue are plotted inside the high confidence  $\alpha$ -helix region indicating a good quality of the model.

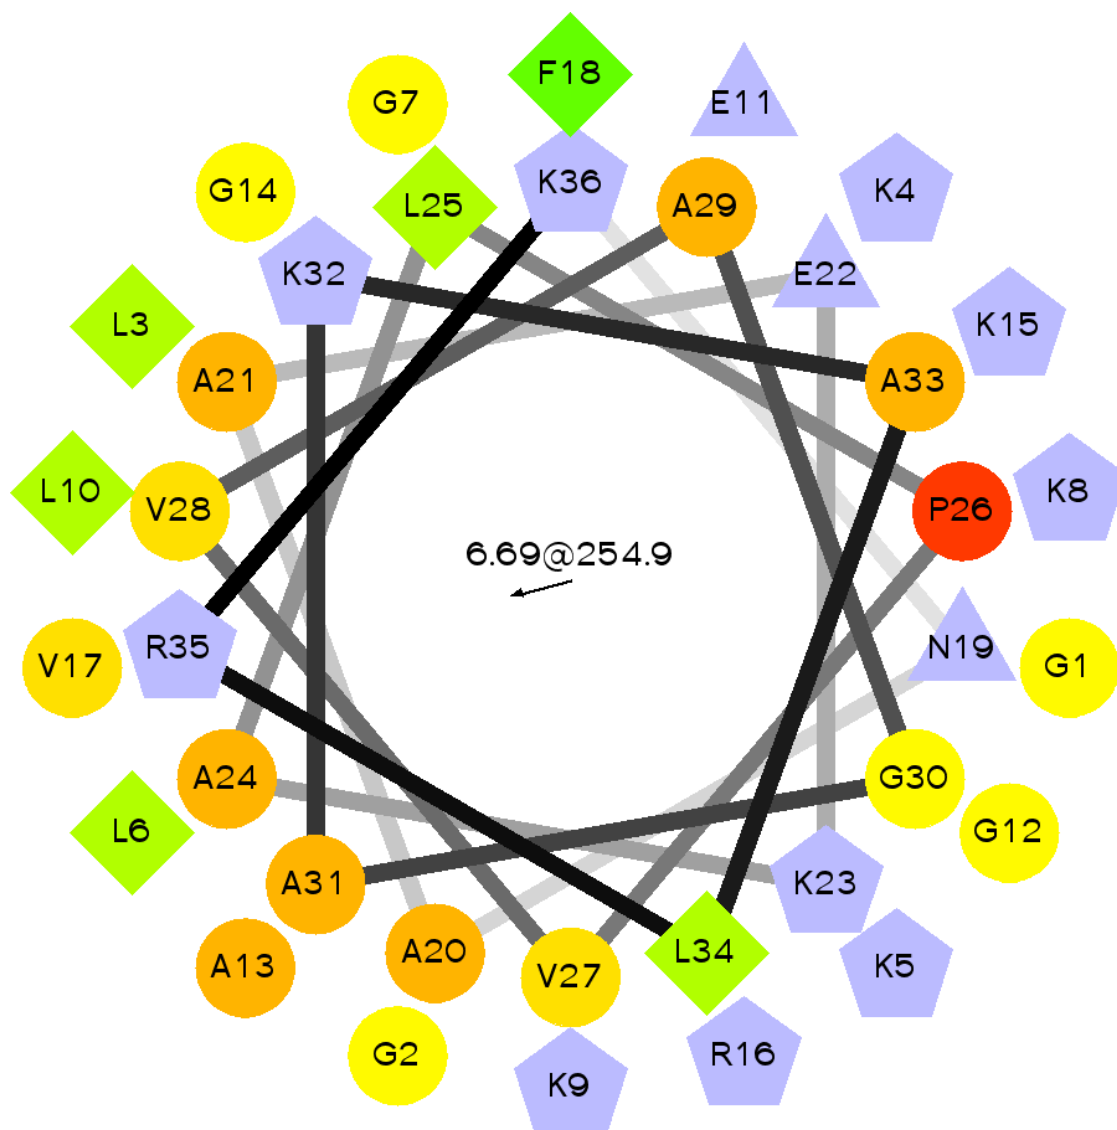

**Figure S2.** Helical-wheel projection cecropin A amphipathic helix. Charged amino acid (light purple) are concentrated on the right side, whereas the non-charged counter parts are dominating the left side.
